# Supplementary material
Source: PubMed Central journal article supplement (PMC3553847)
Supplement: JB.01881-12_zjb999092359so1.pdf [file JB.01881-12_zjb999092359so1.pdf]

Table S1. Oligonucleotides used for this study.

| Name             | Sequence                                | Use/Products                  |
|------------------|-----------------------------------------|-------------------------------|
| DegU-Pro-Biotin3 | 5'-biotin-AAGCCACGCCCTCCTTGTAT-3'       | EMSA-B0, footprint            |
| DegU-pIS-B1      | 5'-ATCGGATCCTCATTCGGCTTGCTGGGCA-3'      | EMSA-B0, -B1, footprint, U-P2 |
| DegU-Bio-R1      | 5'-Biotin-AACTGATGGTCGTCGATAAT-3'       | EMSA-B1, -B11, B2             |
| DegU-pIS-B2      | 5'-ATCGGATCCGATTCGAAAATAGGTCTTGG-3'     | EMSA-B2                       |
| degU-H4          | 5'-CTATTGTCATCGTTCCTTC-3'               | EMSA-H4                       |
| degU-mH4         | 5'-CTATTGTCATAATTCCTTC-3'               | EMSA-H4m                      |
| degU-Pro-bio4    | 5'-biotin-TCATTCGGCTTGCTGGGCAT-3'       | EMSA-H4, -H4m                 |
| ackA-bio         | 5'-biotin-GAAGACCGGACTTGACGAATT-3'      | EMSA-ackA                     |
| ackA-down        | 5'-GATTGACGCTCCTTTATACTC-3'             | EMSA-ackA                     |
| CtsR-F-bio       | 5'-biotin-AGGACGCCGCCAAGCAAGCTT-3'      | EMSA-PclpC                    |
| CtsR-R           | 5'-GAAATATTATGTCCCACTCA-3'              | EMSA-PclpC                    |
| Cre-ackA-FB      | 5'-biotin-TTATTGTAAGCGTTATCAATACGC-3'   | EMSA-Fig. S2                  |
| Cre-ackA-R       | 5'-GCGTATTGATAACGCTTACAATAA-3'          | EMSA-Fig. S2                  |
| Cre-degU-FB      | 5'-biotin-TTGGAAGGAACGATGACAATAGAT-3'   | EMSA-Fig. S2                  |
| Cre-degU-R       | 5'-ATCTATTGTCATCGTTCCTTCCAA-3'          | EMSA-Fig. S2                  |
| mCre-degU-F      | 5'-TTGGAAGGAATTATGACAATAGAT-3'          | Footprint                     |
| mCre-degU-R      | 5'-ATCTATTGTCATAATTCCTTCCAA-3'          | Footprint                     |
| degU-H41-bio     | 5'-biotin-TGCTGGGCATGAAAGAAAGA-3'       | EMSA-Fig. S2                  |
| degU-H41         | 5'-TCTTTCTTTCATGCCAGCA-3'               | EMSA-Fig. S2                  |
| DegU-pIS-B11     | 5'-ATCGGATCCGATTTATTGGAAGGAACGATGAC-3'  | U-del-11, EMSA-B11            |
| DegU-pIS-B11m    | 5'-ATCGGATCCGATTTATTGGAAGGAAttATGAC--3' | U-del-11m                     |
| DegU-pIS-H3      | 5'-GATAAGCTTAACTGATGGTCGTCGATAAT-3'     | U-del11, -11m                 |
| DegU-pIS-H21     | 5'-GATAAGCTTAATATGCCTTTTGGCTCTA-3'      | U-P2                          |
| hprK-Sa          | 5'-ATGGTTCGACGTCGTTTTTCAGCGGCGATCT-3'   | pPhl2-hprK                    |
| hprK-E           | 5'-ATGGAATTCCTCGCACAAAAGACGTAATG-3'     | pPhl2-hprK                    |
| MecA-F           | 5'-GTCGGATCCATGGAAAATTGAAAAGAATTAA-3'   | His-MecA                      |
| MecA-R           | 5'-GTCGGATCCTATGATGCAAAGTGTTTTTTTATC-3' | His-MecA                      |

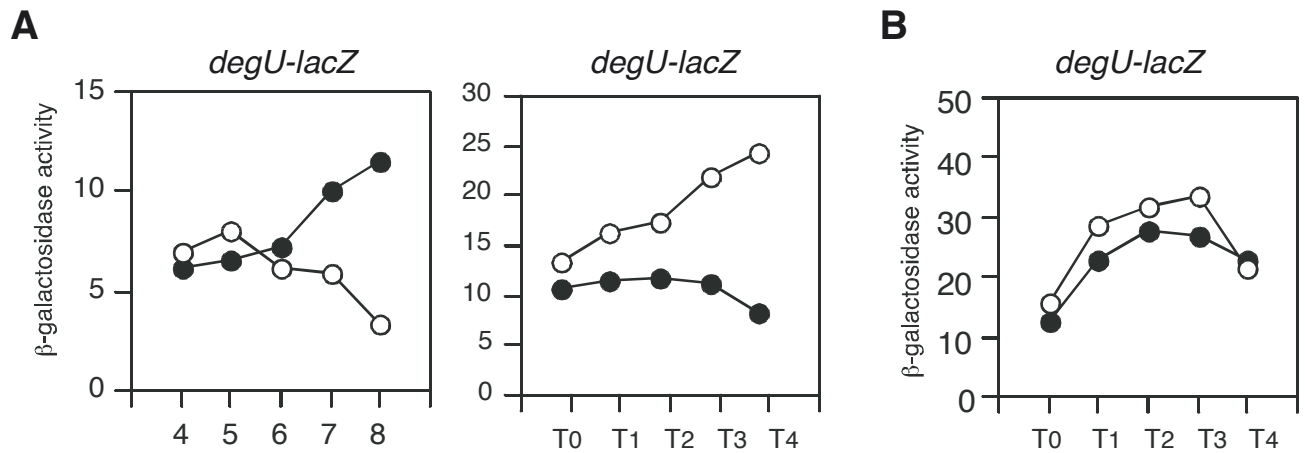

**Figure S1.** Cells were sampled hourly and  $\beta$ -galactosidase activities are shown in Miller units. (A) Expression of the wild-type *degU-lacZ* fusion. Left, cells were grown in LB medium without (closed symbols) or with (open symbols) 2% glucose. The X-axis represents the growth time after inoculation. Right, cells were grown in glucose-based Modified Competence medium (open symbols, Kunst F, Msadek T, Rapoport G. 1994. p 1-20. *In Regulation of Bacterial Differentiation*. American Society for Microbiology, Washington, DC) or MC medium containing 2% glycerol instead of 2% glucose (closed symbols). (B) Expression of the wild-type *degU-lacZ* fusion in the *ccpA* ( $Cm^r$ , closed symbols) and *ccpA clpC* ( $Cm^rTc^r$ , open symbols) strains. Cells were grown in sporulation medium. The X-axis represents the growth time in hours relative to the end of vegetative growth (T0). The phenotype of the *clpC* strain was unstable, thus experiments were performed immediately after transformation several times. A typical result is shown.

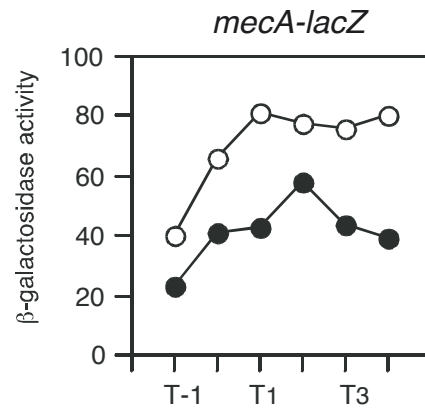

**Figure S2.** Expression of the *mecA-lacZ* fusion. Cells were grown in sporulation medium without (closed symbols) or with (open symbols) 2% glucose. Cells were sampled hourly and  $\beta$ -galactosidase activities are shown in Miller units. The X-axis represents the growth time in hours relative to the end of vegetative growth (T0). The strain has been constructed in Kong L, Siranosian KJ, Grossman AD, and Dubnau D. 1993. *Mol. Microbiol.* **9**:365-733.

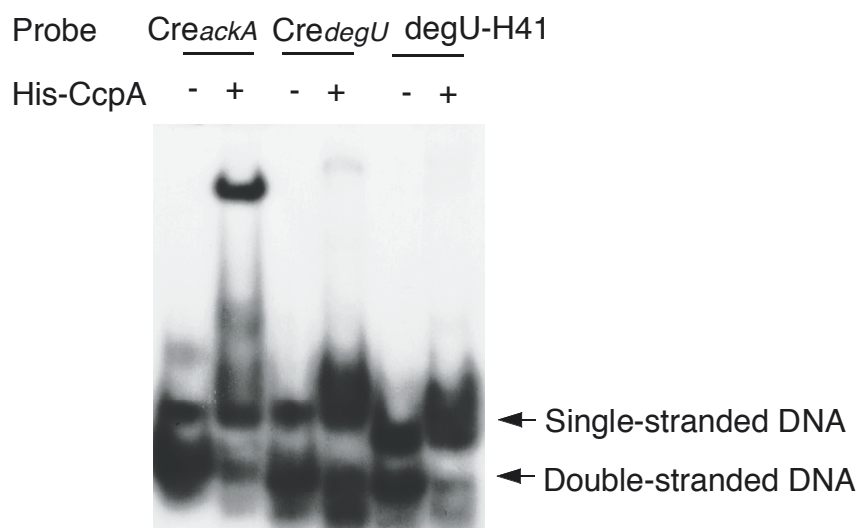

|                                   |                          |
|-----------------------------------|--------------------------|
| <i>CreackA</i><br>(-68 to -45)    | TTATTGTAAGCGTTATCAATACGC |
| <i>CredegU</i><br>(-146 to -123)  | TTGGAAGGAACGATGACAATAGAT |
| <i>degU-H41</i><br>(-172 to -152) | TGCTGGGCATGAAAGAAAGA     |

**Figure S3.** EMSA using His-CcpA. The various probes were prepared by hybridization of the combinations of oligonucleotides indicated in Table S1. The nucleotide sequences of the probes were shown under the panel. The numbers indicate the nucleotide positions relative to the transcription start site. The probes were incubated with His-tagged CcpA (75 nM) as described in Materials and Methods without poly dI-dC. Samples were analyzed in electrophoresis in an 11% non-denaturing polyacrylamide gel.
